# Supplementary material
Source: publisher figshare collection journal article supplement (https://sage.figshare.com/ndownloader/files/11064989)
Supplement: Supplementary file 1 [file 11064989]

# Supplemental material: An omnibus test for the global null hypothesis

Andreas Futschik<sup>1</sup>, Thomas Taus<sup>2</sup>, and Sonja Zehetmayer<sup>3</sup>

<sup>1</sup>Department of Applied Statistics, Johannes Kepler University  
Linz, Austria

<sup>2</sup>Institute of Population Genetics, University of Veterinary  
Medicine Vienna, Austria

<sup>3</sup>Center for Medical Statistics, Informatics, and Intelligent Systems,  
Medical University of Vienna, Austria

January 31, 2018

# 1 Influence of the chosen transformation on the omnibus method

We present additional power curves for the omnibus test for  $m_1 \in \{1, 3, 5, 10\}$  and  $\Delta/\sigma = 0.3/\sqrt{m_1}$  for  $m = 5$  (Fig. 1) as well as  $m = 20$  (Fig. 2) for the following transformations:

- $h(p) = 1 - p$  (omnibus  $p$ )
- $h(p) = -\log p$  (omnibus  $\log p$ )
- $h(p) = z_{1-p}$  (omnibus  $z$ )
- $h(p) = p^{-\alpha}$  with  $\alpha = 0.5$  (omnibus  $power$ )

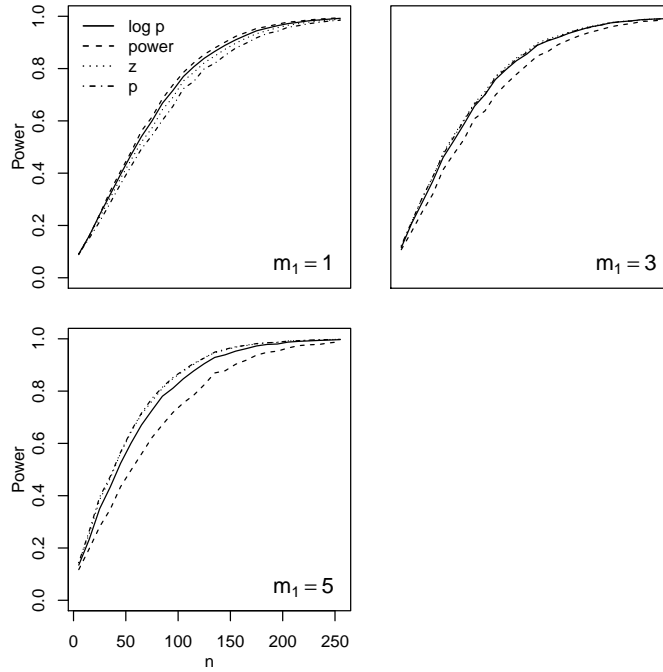

Figure 1: Power values for omnibus  $\log p$ ,  $power$ ,  $z$ , and  $p$  are given for increasing  $n$ ,  $m = 5$ ,  $m_1 \in \{1, 3, 5\}$ ,  $\Delta/\sigma = 0.3/\sqrt{m_1}$ .

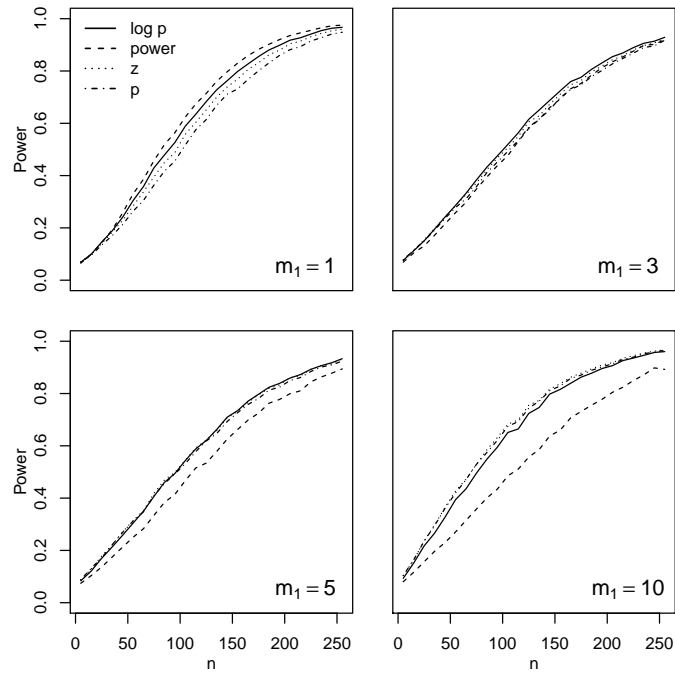

Figure 2: Power values for omnibus log p, power, z, and p are given for increasing  $n$ ,  $m = 20$ ,  $m_1 \in \{1, 3, 5, 10\}$ ,  $\Delta/\sigma = 0.3/\sqrt{m_1}$ .

## 2 Power comparison between different testing methods

Figures 3 and 4 show power curves for omnibus log p, Bonferroni test, Simes test, Fisher combination test, Stouffer's z test, and higher criticism (HC) for  $m_1 \in \{1, 3, 5, 10\}$ , and  $\Delta/\sigma = 0.3/\sqrt{m_1}$  for  $m = 5$  (Fig. 3) as well as  $m = 20$  (Fig. 4).

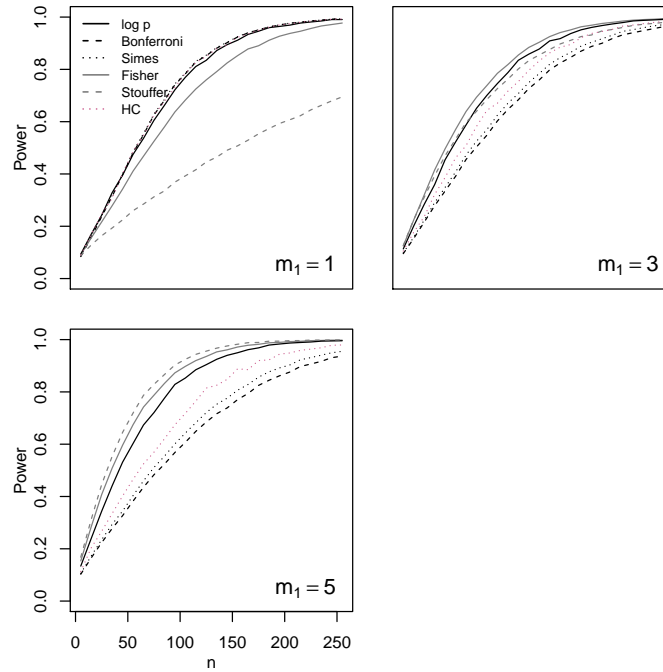

Figure 3: Power values for increasing  $n$ ,  $m = 10$ ,  $m_1 \in \{1, 3, 5\}$ ,  $\Delta/\sigma = 0.3/\sqrt{m_1}$  for omnibus log p, Bonferroni test, Simes test, Fisher combination test, and Stouffer's z test, and HC.

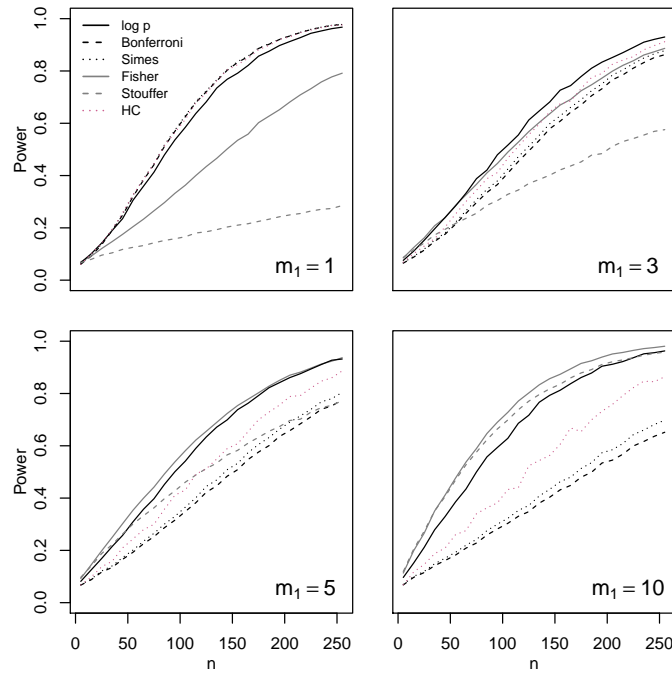

Figure 4: Power values for increasing  $n$ ,  $m = 10$ ,  $m_1 \in \{1, 3, 5, 10\}$ ,  $\Delta/\sigma = 0.3/\sqrt{m_1}$  for omnibus log p, Bonferroni test, Simes test, Fisher combination test, and Stouffer's z test, and HC.

### 3 Type I error

Fig. 5 shows the type I error for the omnibus test for the four transformations (as supplement to Fig. 1 from the manuscript). Note that the upper limit of the y-axis is now 0.1. A horizontal line was drawn at 0.05.

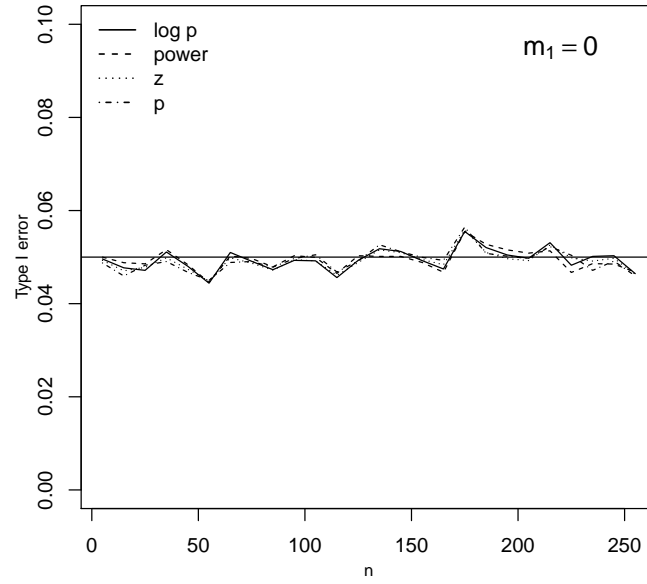

Figure 5: Type I error for omnibus log p, power, z, and p are given for increasing  $n$ ,  $m = 10$ ,  $m_1 = 0$ ,  $\alpha = 0.05$ .

## 4 Two-sided tests

We additionally performed two-sided tests with approx. half of the alternatives with positive and the other half with negative effect sizes. Fig. 6 shows the two-sided equivalent to Fig. 1 from the manuscript. The power values for the two-sided case are lower than for the one-sided case due to the similar type I error rate of 0.05. However, the comparison of the transformations leads to analogous results. Again there are only small differences in power between the transformations, and the log p transform seems to lead to a particularly good trade off in power across many scenarios.

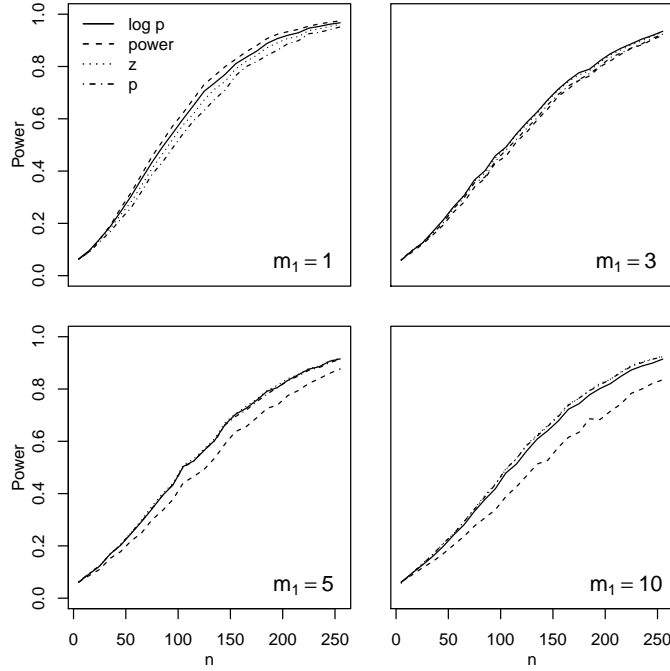

Figure 6: Power values for omnibus log p, power, z, and p are given for increasing  $n$ ,  $m = 10$ ,  $m_1 \in \{1, 3, 5, 10\}$ ,  $\Delta/\sigma = 0.3/\sqrt{m_1}$ ,  $\alpha = 0.05$  for the two-sided test.

## 5 Experimental Evolution

We provide a graphical summary of the approximately  $2.6 \times 10^6$  p-values obtained by applying our omnibus test to five independent measurements of allele frequency change for each SNP considered in the experiment.

The Manhattan plots in Figure 7 provide p-values of separate tests for each of five replicate *Drosophila* populations. The corresponding overall p-values obtained using our omnibus test are displayed in Figure 8. For better visibility, we only plot each 50th SNP.

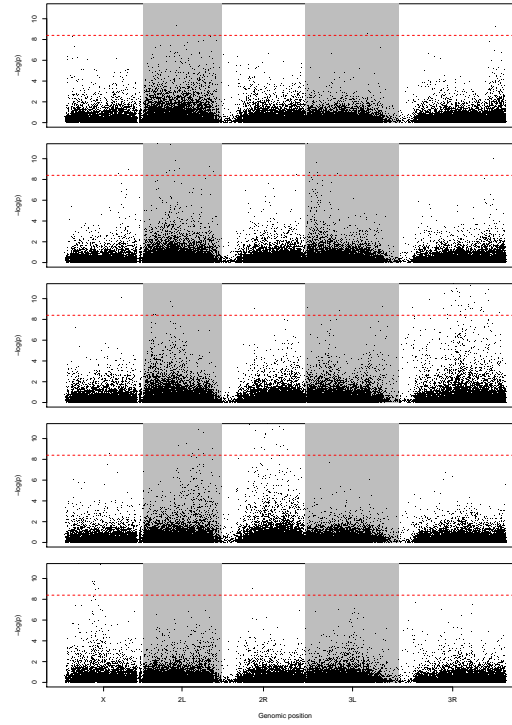

Figure 7: Manhattan plots of negative logarithm of p-values from a genome wide scan of five replicate populations. The red dashed line indicates the significance threshold when using the Bonferroni procedure to control the FWE at  $\alpha = 0.01$ . Data are taken from Griffin et al., (2017).



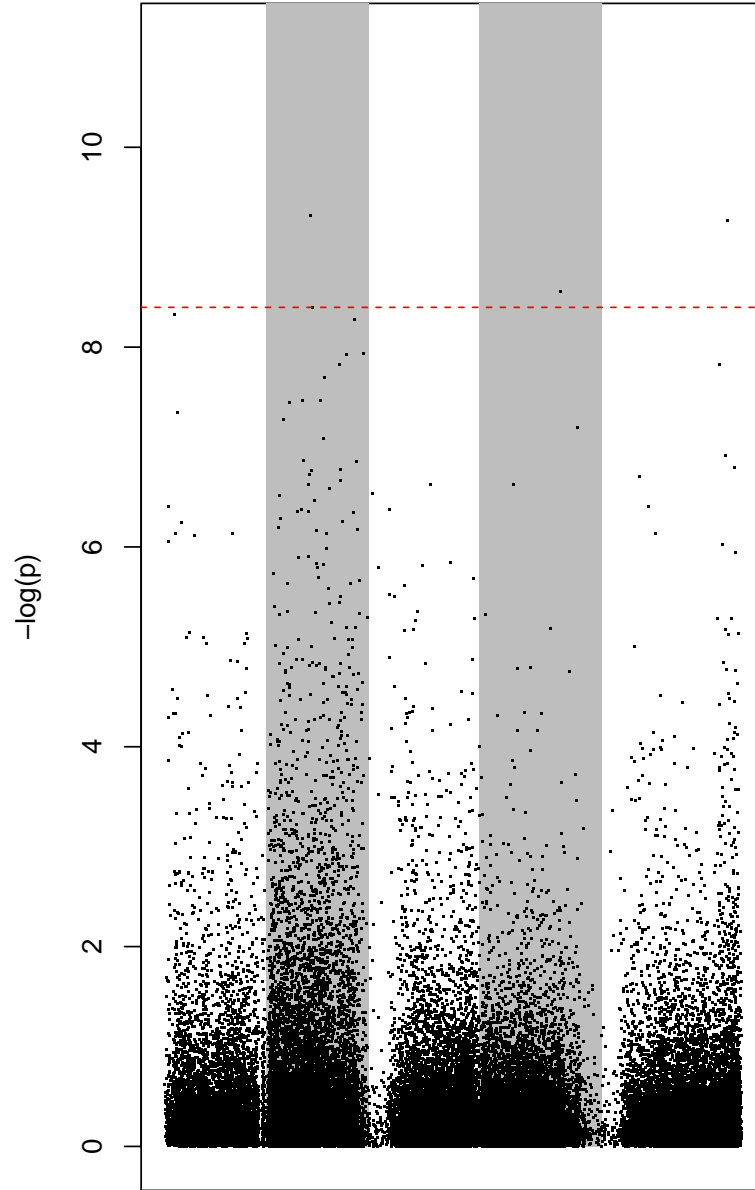

Figure 8: Plot of combined evidence across replicates. <sup>9</sup>Manhattan plots of the negative logarithm of the p-values obtained with our omnibus  $\log p$  test. The red dashed line indicates the significance threshold when using the Bonferroni procedure to control the FWE at  $\alpha = 0.01$ . Data are taken from Griffin et al., (2017).
